# Supplementary material
Source: publisher site journal article supplement (https://www.dovepress.com/article/538438)
Supplement: Supplementary file 1 [file 538438.docx]

Supplement

Table S1. References of studies included in the analysis

| **Study No.** | **Year Pub.** | **Reference** |
| --- | --- | --- |
| 1 | 1920 | M . f . Augenh. 1920 , v64 p 433 Salus , R . Die Zyklodialyse Klin “Die Zyklodialyse” by R. Salus, published in 1920 in Klinische Monatsblätter für Augenheilkunde (Clinical Monthly Reports for Ophthalmology), Volume 64, pages 433–509. Zykloskopische Untersuchungen über das Verhalten des Strahlenkorpers nach derHeinischen Operation |
| 2 | 1920 | M . f . Augenh. 1920 , v64 p 433 Salus , R . Die Zyklodialyse Klin “Die Zyklodialyse” by R. Salus, published in 1920 in Klinische Monatsblätter für Augenheilkunde (Clinical Monthly Reports for Ophthalmology), Volume 64, pages 433–509. Zykloskopische Untersuchungen über das Verhalten des Strahlenkorpers nach derHeinischen Operation |
| 3 | 1930 | Archiv für Augenheilkunde (Archive for Ophthalmology), 1930, Volume 102, pages 626–655. Stein, R Die Dauerresultate der Zyklodialyse |
| 4 | 1931 | Arch Ophthalmol1931;5(3):327-333. <doi:10.1001>. |
| 5 | 1937 | Ztschr. f. Augenh. 92:139,1937 Hausmann, G.: Zur has der Dauerrsul- tate der Zyklodialyse |
| 6 | 1940 | Archives of ophthalmology (1879), 1940-02, Vol.23 (2), p.270-300 |
| 7 | 1941 | Arch of Ophth 1941 v25 Apr p 674 Sugar. H.E. Gonioscopy and Glaucoma |
| 8 | 1946 | Acta Ophthalmol, 24 (1946), p. 27. Louhala, T., and Teraskel,H.: On the Results of Different Glaucoma Operations |
| 9 | 1946 | Am J Ophthalmol 1946 Jul:29:848-53 McPherson , S . D. Cyclodialysis in the treatment of glaucoma |
| 10 | 1947 | Am J Ophthalmol 1947 Sep;30(9):1063-73 |
| 11 | 1947 | Am. J. Ophth. 30:451, 1947. Sugar, H. S.: Cyclodialysis: A Follow-up Study |
| 12 | 1947 | Calif Med 1947 Aug;67(2):78-83 |
| 13 | 1949 | Arch Ophthal 1949 Nov;42(5):606-19 |
| 14 | 1949 | Arch. Ophth. 42:606, 1949 |
| 15 | 1954 | American journal of ophthalmology, 1954-11, Vol.38 |
| 16 | 1957 | Acta ophthalmologica (Oxford, England), 1957-10, Vol.35 (5), p.528-542 |
| 17 | 1957 | Acta ophthalmologica (Oxford, England), 1957-10, Vol.35 (5), p.528-542 |
| 18 | 1958 | Arch Ophthalmol. 1958; 59(4):507-514 |
| 19 | 1958 | Trans Am Ophthalmol Soc. 1958;56:263–274. |
| 20 | 1960 | Arch Ophthalmol. 1960;64(3):408-412. |
| 21 | 1969 | American Journal of Ophthalmology, Volume 67, Issue 4, 522 – 526 |
| 22 | 1976 | Ophthalmic Surg 1976 Summer;7(2):62-73 |
| 23 | 1986 | Acta Ophthalmol (Copenh) 1986 Apr;64(2):142-5 |
| 24 | 1986 | Acta Ophthalmol 64:142–145. Hansen S, Laursen AB (1986) Visualized cyclodialysis-an additional option in glaucoma surgery. |
| 25 | 1995 | Ophthalmologe 1995 Aug;92(4):531-5 |
| 26 | 1998 | Ophthalmic Surg Lasers 1998 Dec;29(12):962-8 |
| 27 | 2013 | Ophthalmic Surgery, Lasers and Imaging Retina, 2013;12(2):92–94 |
| 28 | 2013 | Ophthalmic Surgery, Lasers and Imaging Retina, 2013;29(12):962–968 |
| 29 | 2015 | J Glaucoma 2015 Jan;24(1):37-44. |
| 30 | 2019 | Medicina v Kuzbasse, 18, 20190201, 61; ISSN 1819-0901 |
| 31 | 2019 | Medicina v Kuzbasse, 18, 20190201, 61; ISSN 1819-0901 |
| 32 | 2021 | ISSN 1816-5095 (print); ISSN 2500-0845 (online) <https://doi.org/10.18008/1816-5095-2021-1-61-69> |
| 33 | 2021 | Papa-Vettorazzi, Mario R., et al. “Results of combined surgery, mSICS and cyclodialysis, in patients with glaucoma and cataract. Real-life experience, efficacy and safety Resultados de cirugía combinada, mSICS y ciclodiálisis, en pacientes con glaucoma y |
| 34 | 2021 | Papa-Vettorazzi, Mario R., et al. “Results of combined surgery, mSICS and cyclodialysis, in patients with glaucoma and cataract. Real-life experience, efficacy and safety Resultados de cirugía combinada, mSICS y ciclodiálisis, en pacientes con glaucoma y |
| 35 | 2022 | Kumar, V., Shradqa, A., Frolov, M., Dushina, G. and Bezzabotnov, A. (2022), Acta Ophthalmol, 100:. <https://doi.org/10.1111/j.1755-3768.2022.081> |
| 36 | 2023 | Graefes Arch Clin Exp Ophthalmol 2023 Oct;261(10) :2917-2925 |
| 37 | 2024 | Br J Ophthalmol 2024 Jan 29;108(2):217-222 |
| 38 | 2024 | Clin Ophthalmol 2024 Dec 6:18:3605-3614 |
| 39 | 2024 | J Clin Med 2024 Aug 6;13(16):4593 |
| 40 | 2025 | Ophthalmology Science 2025 Feb (In Press) |
